# Supplementary material for: Residue Levels and Dietary Intake Risk Assessments of 139 Pesticides in Agricultural Produce Using the m-PFC Method Based on SBA-15-C18 with GC-MS/MS
Source: MDPI journal article supplement (doi:10.3390/molecules28062480), 2023-03-08
Supplement: s1 [file s1]

## Supplementary Materials

### Residue Levels and Dietary Intake Risk Assessments of 139 Pesticides in Agricultural Produce Using the m-PFC Method Based on SBA-15-C<sub>18</sub> with GC-MS/MS

Yue Wang <sup>1,2,†</sup>, Tingjie Huang <sup>2,†</sup>, Tao Zhang <sup>2,†</sup>, Xiaoping Ma <sup>2</sup>, GuangShuo, Zhou <sup>2</sup>,  
Meiyao Chi <sup>2</sup>, Xinjie Geng <sup>2</sup>, Chunhao Yuan <sup>1,\*</sup>, Nan Zou <sup>2,\*</sup>

<sup>1</sup> School of Chemistry and Pharmaceutical Engineering, Shandong First Medical  
University, Shandong Academy of Medical Sciences, Tai'an 271016, China

<sup>2</sup> Key Laboratory of Pesticide Toxicology & Application Technique, College of Plant  
Protection, Shandong Agricultural University, Tai'an 271018, China

\*Correspondence: yuanchunhao2017@163.com (C.Y); zounan1226@163.com (N.Z.);

Tel: +086-0538-8242611 (N.Z.)

<sup>†</sup> These authors contributed equally to this work.

Table S1. Recoveries (%) (n = 5) and repeatability (RSD %) from samples spiked at 10 µg kg<sup>-1</sup> of target pesticides in other eight types of fruits and vegetables.

| Compounds    | Watermelon |      | Melon    |      | Asparagus |      | Lotus root |      | Strawberry |      | Cucumber |      | Crown daisy |      | Leaf lettuce |      |
|--------------|------------|------|----------|------|-----------|------|------------|------|------------|------|----------|------|-------------|------|--------------|------|
|              | Recovery   | RSD  | Recovery | RSD  | Recovery  | RSD  | Recovery   | RSD  | Recovery   | RSD  | Recovery | RSD  | Recovery    | RSD  | Recovery     | RSD  |
|              | (%)        | (%)  | (%)      | (%)  | (%)       | (%)  | (%)        | (%)  | (%)        | (%)  | (%)      | (%)  | (%)         | (%)  | (%)          | (%)  |
| Acetochlor   | 98.7       | 4.3  | 94.4     | 8.6  | 97.3      | 10.4 | 84.8       | 8.5  | 106.0      | 5.8  | 93.1     | 4.0  | 95.4        | 8.3  | 89.0         | 6.8  |
| Alachlor     | 97.2       | 8.2  | 89.7     | 5.0  | 100.8     | 3.3  | 78.9       | 9.6  | 103.0      | 10.2 | 95.3     | 6.9  | 97.4        | 6.3  | 96.2         | 9.7  |
| Aldrin       | 99.8       | 3.3  | 91.9     | 3.6  | 95.0      | 7.9  | 92.2       | 6.2  | 101.8      | 6.0  | 88.8     | 12.9 | 87.3        | 7.5  | 84.0         | 5.0  |
| Ametryn      | 89.6       | 7.1  | 75.8     | 9.6  | 95.0      | 7.0  | 89.0       | 10.9 | 95.3       | 7.2  | 93.2     | 10.1 | 76.3        | 9.1  | 79.1         | 8.8  |
| Anilofos     | 86.0       | 7.4  | 82.0     | 10.5 | 98.8      | 14.2 | 92.5       | 5.9  | 94.5       | 7.0  | 86.5     | 12.5 | 84.2        | 6.2  | 73.4         | 6.5  |
| Atrazine     | 96.4       | 7.1  | 77.1     | 13.1 | 92.6      | 6.0  | 89.2       | 13.0 | 104.3      | 8.6  | 92.6     | 5.1  | 101.6       | 3.4  | 91.3         | 6.3  |
| Azoxystrobin | 97.2       | 10.2 | 99.2     | 10.6 | 112.6     | 5.5  | 77.5       | 7.9  | 101.7      | 4.4  | 95.2     | 10.9 | 86.3        | 11.5 | 91.1         | 5.5  |
| Benfuracarb  | 102.9      | 8.0  | 96.8     | 5.2  | 99.9      | 7.4  | 102.9      | 8.0  | 86.5       | 8.2  | 72.9     | 9.8  | 75.8        | 6.2  | 103.3        | 4.4  |
| α-HCH        | 101.9      | 9.7  | 95.0     | 10.9 | 100.5     | 8.8  | 101.9      | 9.7  | 86.5       | 12.5 | 84.5     | 7.1  | 76.1        | 8.6  | 97.7         | 6.1  |
| β- HCH       | 115.7      | 7.2  | 98.9     | 3.2  | 83.4      | 10.2 | 118.7      | 7.2  | 92.6       | 5.1  | 77.4     | 9.0  | 86.8        | 5.9  | 101.4        | 6.2  |
| γ-HCH        | 98.4       | 6.2  | 86.1     | 8.3  | 117.2     | 13.0 | 75.8       | 6.2  | 95.2       | 10.9 | 104.8    | 7.4  | 72.5        | 7.6  | 90.3         | 5.5  |
| δ- HCH       | 80.2       | 8.6  | 91.9     | 4.9  | 106.7     | 10.1 | 76.1       | 8.6  | 75.9       | 9.8  | 90.9     | 11.3 | 80.7        | 5.4  | 92.7         | 6.0  |
| Bifenox      | 87.3       | 11.4 | 82.3     | 13.1 | 86.4      | 8.8  | 86.8       | 5.9  | 85.0       | 2.5  | 77.9     | 7.1  | 83.1        | 10.2 | 97.0         | 7.1  |
| Bifenthrin   | 82.9       | 8.5  | 87.8     | 9.2  | 75.7      | 8.8  | 72.5       | 7.6  | 80.8       | 11.5 | 98.4     | 16.0 | 97.8        | 8.2  | 106.0        | 6.7  |
| Boscalid     | 84.5       | 7.1  | 90.6     | 5.8  | 102.8     | 6.5  | 80.7       | 5.4  | 100.6      | 6.7  | 101.1    | 5.6  | 73.0        | 9.2  | 99.1         | 6.4  |
| Bromobutide  | 79.4       | 9.0  | 88.3     | 8.4  | 94.9      | 9.4  | 83.1       | 10.2 | 87.9       | 8.3  | 85.4     | 14.8 | 82.4        | 13.5 | 102.2        | 5.1  |
| Bromoxynil   | 104.8      | 7.4  | 99.6     | 6.6  | 95.3      | 13.5 | 97.8       | 8.2  | 102.8      | 4.2  | 88.2     | 5.2  | 99.0        | 7.0  | 99.7         | 5.5  |
| Buprofezin   | 80.9       | 11.3 | 79.1     | 9.8  | 91.4      | 3.8  | 73.0       | 9.2  | 101.1      | 5.6  | 103.4    | 4.2  | 109.4       | 10.3 | 95.3         | 13.5 |
| Butachlor    | 79.9       | 7.1  | 86.7     | 11.0 | 84.6      | 11.8 | 72.4       | 13.5 | 75.4       | 14.8 | 91.6     | 8.1  | 105.2       | 6.6  | 91.4         | 3.8  |

|                      |       |      |       |      |       |      |       |      |       |      |       |      |       |      |       |      |
|----------------------|-------|------|-------|------|-------|------|-------|------|-------|------|-------|------|-------|------|-------|------|
| Butralin             | 97.7  | 15.5 | 80.8  | 11.5 | 83.8  | 8.5  | 99.0  | 7.0  | 88.2  | 5.2  | 98.7  | 3.4  | 105.5 | 7.2  | 84.6  | 11.8 |
| Carbophenothion      | 112.0 | 9.8  | 100.6 | 6.7  | 88.2  | 7.1  | 100.9 | 4.6  | 81.7  | 5.7  | 83.0  | 8.5  | 96.6  | 4.7  | 83.8  | 8.5  |
| Carboxin             | 112.0 | 4.6  | 87.9  | 8.3  | 85.3  | 5.0  | 95.7  | 4.6  | 84.8  | 7.1  | 104.0 | 13.1 | 91.3  | 7.3  | 88.2  | 7.1  |
| Chlorfenapyr         | 109.7 | 5.5  | 102.8 | 4.2  | 100.9 | 4.6  | 88.8  | 8.6  | 78.7  | 5.9  | 97.1  | 6.9  | 105.1 | 4.8  | 85.3  | 5.0  |
| Chlorfluazuron       | 96.6  | 10.5 | 105.7 | 8.5  | 95.7  | 4.6  | 108.7 | 7.2  | 85.7  | 7.7  | 93.6  | 5.6  | 107.8 | 8.6  | 100.9 | 4.6  |
| Chlorpropham         | 110.9 | 5.2  | 87.6  | 6.4  | 88.8  | 8.6  | 97.7  | 8.6  | 75.9  | 7.5  | 99.2  | 6.2  | 108.8 | 6.0  | 95.7  | 4.6  |
| Chlorpyrifos         | 106.3 | 4.0  | 97.9  | 5.0  | 108.7 | 7.2  | 82.4  | 8.5  | 80.5  | 16.5 | 78.2  | 13.6 | 107.9 | 4.4  | 88.8  | 8.6  |
| Clodinafop-propargyl | 100.4 | 6.7  | 94.6  | 4.6  | 107.8 | 8.6  | 95.7  | 10.5 | 110.9 | 5.2  | 87.6  | 6.4  | 111.4 | 7.4  | 108.7 | 7.2  |
| Clomazone            | 106.2 | 2.4  | 81.5  | 11.8 | 108.8 | 6.0  | 100.1 | 5.6  | 106.3 | 4.0  | 97.9  | 5.0  | 85.3  | 5.0  | 83.1  | 10.2 |
| Coumaphos            | 97.9  | 5.0  | 78.7  | 5.2  | 107.9 | 4.4  | 104.5 | 4.0  | 100.4 | 6.7  | 94.6  | 4.6  | 100.9 | 4.6  | 97.8  | 8.2  |
| Cycloxydim           | 94.6  | 4.6  | 85.7  | 10.9 | 111.4 | 7.4  | 100.3 | 3.4  | 106.2 | 2.4  | 81.5  | 11.8 | 95.7  | 4.6  | 73.0  | 9.2  |
| Cyfluthrin 1         | 81.5  | 11.8 | 75.9  | 3.2  | 115.3 | 13.2 | 101.2 | 6.3  | 75.0  | 10.5 | 72.9  | 11.2 | 88.8  | 8.6  | 79.4  | 13.5 |
| Cyfluthrin 2         | 82.9  | 11.2 | 80.5  | 8.3  | 100.1 | 5.1  | 103.8 | 9.2  | 109.8 | 3.6  | 76.4  | 12.4 | 108.7 | 7.2  | 99.0  | 7.0  |
| Cyfluthrin 3         | 81.4  | 12.4 | 74.8  | 4.9  | 100.4 | 3.3  | 110.0 | 10.2 | 95.1  | 5.9  | 97.9  | 5.5  | 97.7  | 8.6  | 90.9  | 7.4  |
| Cyfluthrin 4         | 97.9  | 5.5  | 86.6  | 4.2  | 98.1  | 6.4  | 100.9 | 9.9  | 114.8 | 6.6  | 93.7  | 6.2  | 82.4  | 8.5  | 76.7  | 9.7  |
| Cyhalothrin 1        | 93.7  | 6.2  | 92.3  | 8.5  | 91.7  | 3.8  | 92.5  | 4.4  | 74.4  | 12.4 | 74.8  | 14.2 | 95.7  | 10.5 | 97.1  | 6.5  |
| Cyhalothrin 2        | 78.0  | 11.1 | 98.4  | 6.4  | 105.0 | 3.9  | 102.2 | 5.0  | 97.9  | 5.5  | 86.6  | 7.5  | 83.4  | 10.1 | 90.5  | 12.3 |
| Cypermethrin 1       | 89.4  | 11.8 | 97.4  | 7.9  | 77.6  | 10.9 | 90.2  | 7.2  | 93.7  | 6.2  | 92.3  | 5.1  | 89.5  | 8.2  | 117.5 | 13.5 |
| Cypermethrin 2       | 89.0  | 5.9  | 96.9  | 10.4 | 98.2  | 7.6  | 97.3  | 6.0  | 72.0  | 11.1 | 98.4  | 5.5  | 76.4  | 8.5  | 98.1  | 6.4  |
| Cypermethrin 3       | 104.3 | 2.8  | 95.0  | 3.3  | 96.5  | 6.3  | 98.7  | 6.9  | 89.4  | 11.8 | 97.4  | 3.9  | 97.1  | 6.5  | 103.2 | 11.3 |
| Cypermethrin 4       | 81.6  | 7.4  | 82.4  | 7.9  | 87.8  | 6.6  | 90.5  | 16.2 | 99.5  | 6.3  | 82.2  | 7.5  | 80.5  | 12.3 | 90.9  | 6.3  |
| Cyproconazole        | 83.1  | 8.0  | 97.3  | 7.0  | 90.2  | 7.2  | 82.5  | 3.6  | 88.2  | 5.5  | 78.1  | 13.8 | 117.5 | 13.5 | 112.0 | 11.2 |
| Cyprodinil           | 114.5 | 13.9 | 101.1 | 14.2 | 97.3  | 6.0  | 78.0  | 12.5 | 94.3  | 4.9  | 100.5 | 7.1  | 98.1  | 6.4  | 100.1 | 5.6  |
| Deltamethrin         | 104.9 | 10.2 | 99.9  | 6.0  | 96.2  | 4.6  | 82.1  | 10.5 | 104.4 | 6.1  | 97.4  | 7.5  | 91.7  | 3.8  | 104.5 | 4    |

|                      |       |      |       |      |       |      |       |      |       |      |       |      |       |      |       |      |
|----------------------|-------|------|-------|------|-------|------|-------|------|-------|------|-------|------|-------|------|-------|------|
| Diafenthiuron        | 107.3 | 6.2  | 109.2 | 5.5  | 95.3  | 5.5  | 75.0  | 8.6  | 96.1  | 11.2 | 90.8  | 10.6 | 105.0 | 3.9  | 100.3 | 3.4  |
| Diazinon             | 78.1  | 8.3  | 103.5 | 7.4  | 95.7  | 6.0  | 89.0  | 10.2 | 78.1  | 13.8 | 90.7  | 8.0  | 97.6  | 10.9 | 101.2 | 6.3  |
| Diclofop-methyl      | 85.0  | 12.6 | 95.2  | 8.8  | 81.3  | 11.0 | 93.3  | 9.3  | 100.5 | 7.1  | 103.5 | 7.9  | 98.2  | 7.6  | 103.8 | 9.2  |
| Dieldrin             | 101.5 | 5.2  | 101.7 | 10.2 | 112.5 | 13.1 | 96.4  | 6.5  | 97.4  | 7.5  | 101.5 | 7.2  | 96.5  | 6.3  | 110.0 | 10.2 |
| Diethofencarb        | 94.9  | 2.5  | 102.0 | 8.3  | 87.4  | 6.2  | 96.2  | 6.3  | 90.8  | 10.6 | 101.3 | 5.2  | 98.0  | 13.5 | 93.4  | 10.1 |
| Difenzoquat          | 94.3  | 4.4  | 85.6  | 10.4 | 97.4  | 7.4  | 75.1  | 11.4 | 85.6  | 7.1  | 109.2 | 4.6  | 98.8  | 10.6 | 89.5  | 8.2  |
| Diflufenican         | 100.2 | 10.6 | 91.3  | 7.5  | 88.9  | 8.2  | 98.8  | 5.8  | 91.3  | 5.9  | 95.6  | 7.8  | 106.6 | 10.3 | 76.4  | 8.5  |
| $\alpha$ -endosulfan | 80.2  | 6.3  | 83.3  | 3.9  | 93.3  | 9.3  | 90.3  | 6.6  | 83.3  | 8.2  | 76.7  | 10.2 | 101.3 | 5.8  | 88.1  | 5.9  |
| $\beta$ -endosulfan  | 91.7  | 5.2  | 80.4  | 6.8  | 91.4  | 6.2  | 93.9  | 9.4  | 80.4  | 5.9  | 98.3  | 5.5  | 118.6 | 10.5 | 95.7  | 9.1  |
| Endrin               | 94.2  | 9.8  | 89.0  | 7.9  | 111.3 | 4.4  | 81.7  | 9.2  | 101.9 | 6.2  | 96.1  | 11.2 | 111.7 | 11.4 | 83.0  | 6.3  |
| Ethofumesate         | 102.4 | 9.7  | 104.3 | 12.6 | 104.6 | 9.7  | 91.5  | 6.6  | 103.8 | 3.8  | 94.3  | 4.4  | 119.5 | 12.0 | 88.3  | 10.5 |
| Etridiazole          | 83.5  | 10.2 | 81.6  | 10.4 | 90.2  | 9.4  | 96.1  | 6.8  | 107.2 | 7.3  | 100.2 | 10.6 | 109.6 | 5.0  | 90.6  | 6.2  |
| Famoxadone           | 83.7  | 5.6  | 83.1  | 6.2  | 104.5 | 5.9  | 89.3  | 9.4  | 81.7  | 8.1  | 80.2  | 6.3  | 102.8 | 9.3  | 106.8 | 7.5  |
| Fenarimol            | 82.8  | 8.8  | 104.5 | 8.3  | 109.0 | 6.2  | 92.6  | 4.4  | 109.0 | 11.0 | 91.7  | 5.2  | 95.8  | 5.9  | 96.2  | 4.6  |
| Fenazaquin           | 89.8  | 7.1  | 104.9 | 12.6 | 108.6 | 6.2  | 106.4 | 7.4  | 107.2 | 4.6  | 94.2  | 9.8  | 88.3  | 10.5 | 98.2  | 7.6  |
| Fenbuconazole        | 113.4 | 12.6 | 107.3 | 4.4  | 100.6 | 4.1  | 77.2  | 12.9 | 116.4 | 4.2  | 102.4 | 9.7  | 90.6  | 6.2  | 96.5  | 6.3  |
| Fenitrothion         | 109.8 | 6.5  | 89.8  | 7.1  | 95.0  | 6.3  | 86.0  | 5.3  | 92.5  | 5.5  | 88.2  | 5.5  | 106.8 | 7.5  | 87.8  | 6.6  |
| Fenobucarb           | 93.1  | 4.6  | 113.4 | 12.6 | 106.0 | 3.6  | 100.0 | 7.3  | 89.9  | 12.4 | 94.3  | 4.9  | 96.2  | 4.6  | 90.2  | 7.2  |
| Fenoxaprop-P         | 98.1  | 11.4 | 96.2  | 6.8  | 81.3  | 3.4  | 93.4  | 9.8  | 86.3  | 9.5  | 104.4 | 6.1  | 95.3  | 5.5  | 97.3  | 6.0  |
| Fenpropathrin        | 92.2  | 13.1 | 96.4  | 5.9  | 87.9  | 10.2 | 95.0  | 10.9 | 94.1  | 10.9 | 96.1  | 11.2 | 95.7  | 6.0  | 98.7  | 6.9  |
| Fenthion             | 110.4 | 9.5  | 91.6  | 7.9  | 97.2  | 3.6  | 85.8  | 10.9 | 104.3 | 10.9 | 94.3  | 4.4  | 81.3  | 11.0 | 99.5  | 16.2 |
| Fipronil             | 103.0 | 4.1  | 85.3  | 5.8  | 85.6  | 8.4  | 93.7  | 6.8  | 102.8 | 10.6 | 100.2 | 10.6 | 112.5 | 13.1 | 82.5  | 3.6  |
| Fluazifop-P-butyl    | 113.9 | 8.2  | 85.0  | 7.3  | 104.9 | 7.8  | 88.2  | 10.3 | 104.3 | 2.8  | 95.0  | 3.3  | 87.4  | 6.2  | 80.0  | 12.5 |
| Fludioxonil          | 101.3 | 8.6  | 102.5 | 8.8  | 91.7  | 5.2  | 87.3  | 6.3  | 81.6  | 7.4  | 82.4  | 7.9  | 97.4  | 7.4  | 82.1  | 10.5 |

|                   |       |      |       |      |       |      |       |      |       |      |       |      |       |      |       |      |
|-------------------|-------|------|-------|------|-------|------|-------|------|-------|------|-------|------|-------|------|-------|------|
| Flufenoxuron      | 83.5  | 10.2 | 91.6  | 7.4  | 103.1 | 3.6  | 93.9  | 4.4  | 83.1  | 8.0  | 97.3  | 7.0  | 82.5  | 3.6  | 88.6  | 5.1  |
| Flumioxazin       | 83.7  | 5.6  | 83.1  | 8.0  | 106.7 | 5.5  | 81.4  | 11.3 | 114.5 | 13.9 | 111.1 | 14.2 | 88.0  | 12.5 | 99.1  | 7.2  |
| Fluorochloridone  | 82.8  | 8.8  | 114.5 | 13.9 | 100.3 | 7.3  | 82.1  | 8.4  | 104.9 | 10.2 | 99.9  | 6.0  | 82.1  | 10.5 | 99.1  | 8.8  |
| Fluoroglycofen    | 89.8  | 7.1  | 104.9 | 10.2 | 98.9  | 3.8  | 72.0  | 6.5  | 107.3 | 6.2  | 109.2 | 5.5  | 75.0  | 8.6  | 106.1 | 11.4 |
| Fluroxypyr        | 113.4 | 12.6 | 107.3 | 6.2  | 118.6 | 8.0  | 111.9 | 7.9  | 78.1  | 8.3  | 103.5 | 7.4  | 89.0  | 10.2 | 79.7  | 10.5 |
| Flusilazole       | 96.2  | 6.8  | 78.1  | 8.3  | 93.4  | 9.8  | 96.4  | 7.8  | 75.0  | 12.6 | 95.2  | 8.8  | 79.1  | 10.5 | 95.8  | 9.4  |
| Flutolanil        | 96.4  | 5.9  | 75.0  | 12.6 | 95.0  | 10.9 | 84.6  | 10.1 | 101.5 | 5.2  | 101.7 | 10.2 | 85.8  | 8.5  | 96.8  | 5.9  |
| Fomesafen         | 92.0  | 8.2  | 87.3  | 5.3  | 85.8  | 10.9 | 106.8 | 7.2  | 98.1  | 11.4 | 96.2  | 6.8  | 79.7  | 7.1  | 95.6  | 6.2  |
| Fonofos           | 116.0 | 10.4 | 103.7 | 11.1 | 93.7  | 6.8  | 87.2  | 6.5  | 92.2  | 13.1 | 96.4  | 5.9  | 92.7  | 6.2  | 109.3 | 6.0  |
| Haloxypop-P       | 116.7 | 7.5  | 119.1 | 15.4 | 88.2  | 10.3 | 94.9  | 8.2  | 110.4 | 9.5  | 91.6  | 7.9  | 87.1  | 9.4  | 104.7 | 3.3  |
| Imazalil          | 102.5 | 3.9  | 72.5  | 9.4  | 100.3 | 8.2  | 86.9  | 10.2 | 103.0 | 4.1  | 85.3  | 5.8  | 93.2  | 7.1  | 93.5  | 8.5  |
| Irgarol 1051      | 100.9 | 6.8  | 86.7  | 11.3 | 82.1  | 8.4  | 100.9 | 7.5  | 113.9 | 8.2  | 85.0  | 7.3  | 111.3 | 4.4  | 96.4  | 6.5  |
| Isocarbophos      | 113.3 | 7.9  | 93.3  | 8.2  | 72.0  | 6.5  | 84.1  | 12.2 | 101.3 | 8.6  | 102.5 | 8.8  | 104.6 | 9.7  | 96.2  | 6.3  |
| Isodrin           | 118.0 | 12.6 | 100.9 | 6.6  | 111.9 | 7.9  | 101.6 | 3.7  | 108.5 | 5.1  | 92.4  | 5.3  | 90.2  | 9.4  | 77.1  | 11.4 |
| Isofenphos-methyl | 88.5  | 10.4 | 93.6  | 5.9  | 75.5  | 11.5 | 72.9  | 7.0  | 106.5 | 7.0  | 90.7  | 6.6  | 104.5 | 5.9  | 98.8  | 5.8  |
| Isoprocarb        | 99.3  | 7.5  | 85.7  | 6.7  | 100.0 | 4.0  | 97.9  | 7.1  | 92.0  | 8.2  | 87.3  | 5.3  | 109.0 | 6.2  | 90.3  | 6.6  |
| Isoprothiolane    | 85.0  | 7.3  | 96.4  | 8.2  | 94.6  | 6.1  | 96.9  | 5.4  | 116.0 | 10.4 | 103.7 | 11.1 | 108.6 | 6.2  | 93.9  | 9.4  |
| Kresoxim-methyl   | 102.5 | 8.8  | 75.7  | 8.6  | 97.7  | 7.6  | 97.5  | 8.1  | 102.5 | 8.8  | 75.7  | 5.5  | 100.6 | 4.4  | 81.7  | 9.2  |
| Malathion         | 92.4  | 5.3  | 88.4  | 10.2 | 101.0 | 8.3  | 102.1 | 4.4  | 92.4  | 5.3  | 88.4  | 7.0  | 113.5 | 9.3  | 95.0  | 6.3  |
| Mefenacet         | 90.7  | 6.6  | 84.6  | 5.6  | 101.4 | 4.4  | 77.6  | 5.2  | 90.7  | 6.6  | 84.6  | 8.4  | 101.2 | 4.7  | 106.0 | 3.6  |
| Mepronil          | 87.3  | 5.3  | 76.4  | 8.8  | 87.8  | 6.5  | 82.8  | 11.2 | 87.3  | 5.3  | 76.4  | 15.6 | 81.7  | 9.2  | 96.2  | 10.2 |
| Metazachlor       | 92.9  | 7.9  | 102.8 | 7.1  | 96.9  | 9.1  | 84.1  | 5.9  | 103.7 | 11.1 | 88.2  | 10.2 | 95.0  | 6.3  | 91.5  | 6.6  |
| Methidathion      | 88.8  | 8.3  | 94.9  | 9.4  | 103.6 | 3.2  | 78.5  | 6.3  | 119.1 | 15.4 | 115.7 | 13.4 | 106.0 | 3.6  | 96.1  | 6.8  |
| Metribuzin        | 93.5  | 5.2  | 80.9  | 5.6  | 101.6 | 10.2 | 89.0  | 6.6  | 72.5  | 9.4  | 99.0  | 4.9  | 81.3  | 3.4  | 99.3  | 9.4  |

|                  |       |      |       |      |       |      |       |      |       |      |       |      |       |      |       |      |
|------------------|-------|------|-------|------|-------|------|-------|------|-------|------|-------|------|-------|------|-------|------|
| Monocrotophos    | 93.0  | 11.0 | 82.5  | 7.5  | 101.7 | 4.9  | 94.4  | 8.6  | 86.7  | 11.3 | 78.1  | 9.9  | 87.9  | 10.2 | 92.6  | 4.4  |
| Myclobutanil     | 92.9  | 5.7  | 99.8  | 5.5  | 96.9  | 5.4  | 95.0  | 3.2  | 93.3  | 8.2  | 90.0  | 8.0  | 97.2  | 3.6  | 106.4 | 7.4  |
| Napropamide      | 90.6  | 8.6  | 90.4  | 5.9  | 97.5  | 8.1  | 95.0  | 5.7  | 88.2  | 10.2 | 90.3  | 5.6  | 85.6  | 8.4  | 77.2  | 12.9 |
| Norflurazon      | 116.6 | 10.2 | 73.6  | 12.8 | 102.1 | 4.4  | 98.8  | 7.9  | 115.7 | 13.4 | 103.2 | 10.9 | 78.7  | 11.4 | 97.1  | 10.5 |
| o,p'-DDD         | 87.4  | 9.4  | 92.2  | 6.9  | 78.8  | 6.2  | 92.6  | 4.7  | 99.0  | 4.9  | 105.4 | 6.2  | 89.7  | 12.5 | 96.7  | 7.4  |
| o,p'-DDE         | 102.8 | 8.2  | 75.3  | 9.8  | 98.1  | 5.1  | 120.6 | 13.3 | 78.1  | 9.9  | 100.7 | 6.5  | 87.3  | 6.3  | 90.5  | 7.5  |
| o,p'-DDT         | 99.3  | 8.0  | 76.8  | 10.6 | 98.7  | 4.3  | 95.1  | 5.5  | 90.0  | 8.0  | 100.3 | 5.3  | 93.9  | 4.4  | 99.3  | 8.5  |
| Oxadiazon        | 91.0  | 5.3  | 88.8  | 10.8 | 91.9  | 3.6  | 82.7  | 8.2  | 99.5  | 6.3  | 84.8  | 6.3  | 81.4  | 11.3 | 95.4  | 4.2  |
| Oxadixyl         | 111.9 | 9.2  | 87.8  | 11.8 | 75.8  | 9.6  | 99.8  | 3.3  | 117.9 | 14.8 | 93.9  | 6.3  | 82.1  | 8.4  | 96.4  | 7.8  |
| Oxaziclomefone   | 102.1 | 6.7  | 84.8  | 9.4  | 82.0  | 10.5 | 89.6  | 7.1  | 98.4  | 6.3  | 111.9 | 10.2 | 72.0  | 6.5  | 84.6  | 10.1 |
| Oxyfluorfen      | 108.5 | 10.9 | 98.1  | 5.3  | 87.1  | 13.1 | 86.0  | 7.4  | 98.4  | 4.6  | 103.1 | 12.0 | 111.9 | 7.9  | 106.8 | 7.2  |
| p,p'-DDD         | 118.1 | 3.6  | 101.7 | 7.8  | 99.2  | 10.6 | 96.4  | 7.1  | 113.3 | 7.9  | 93.3  | 8.2  | 85.5  | 11.5 | 87.2  | 6.5  |
| p,p'-DDE         | 86.1  | 5.0  | 118.9 | 9.5  | 89.6  | 12.4 | 97.2  | 10.2 | 118.0 | 12.6 | 100.9 | 6.6  | 100.0 | 4.0  | 94.9  | 8.2  |
| p,p'-DDT         | 105.5 | 8.7  | 102.1 | 6.7  | 87.9  | 9.4  | 78.2  | 12.8 | 88.5  | 10.4 | 93.6  | 5.9  | 94.6  | 6.1  | 86.9  | 10.2 |
| Parathion        | 107.1 | 10.1 | 88.0  | 14.2 | 107.5 | 6.3  | 96.5  | 5.8  | 99.3  | 7.5  | 85.7  | 6.7  | 102.1 | 6.7  | 84.8  | 9.4  |
| Parathion-methyl | 108.7 | 10.9 | 93.0  | 7.9  | 113.1 | 9.5  | 87.7  | 10.0 | 111.9 | 9.2  | 87.8  | 11.8 | 108.5 | 10.9 | 98.1  | 5.3  |
| Penconzole       | 104.8 | 12.5 | 95.0  | 10.6 | 97.9  | 10.5 | 96.4  | 7.5  | 102.1 | 6.7  | 84.8  | 9.4  | 118.1 | 3.6  | 101.7 | 7.8  |
| Pendimethalin    | 110.2 | 3.5  | 92.9  | 7.9  | 98.2  | 5.8  | 89.6  | 12.4 | 108.5 | 10.9 | 98.1  | 5.3  | 86.1  | 5.0  | 118.9 | 9.5  |
| Permethrin 1     | 96.4  | 8.6  | 91.6  | 6.8  | 108.5 | 12.0 | 87.9  | 9.4  | 118.1 | 3.6  | 101.7 | 7.8  | 105.5 | 8.7  | 102.1 | 6.7  |
| Permethrin 2     | 75.7  | 5.5  | 107.4 | 8.1  | 85.2  | 4.7  | 102.1 | 7.9  | 86.1  | 5.0  | 116.9 | 9.5  | 107.1 | 10.1 | 88.0  | 14.2 |
| Phenthoate       | 88.4  | 7.0  | 103.6 | 4.0  | 92.1  | 6.5  | 88.9  | 5.0  | 105.5 | 8.7  | 102.1 | 6.7  | 108.7 | 10.9 | 93.0  | 7.9  |
| Phorate          | 84.6  | 8.4  | 100.3 | 5.0  | 109.7 | 9.9  | 83.0  | 10.2 | 84.8  | 9.4  | 78.1  | 4.4  | 104.8 | 12.5 | 95.0  | 10.6 |
| Phosalone        | 77.4  | 15.6 | 82.7  | 11.3 | 104.6 | 3.4  | 103.0 | 8.8  | 98.1  | 5.3  | 99.9  | 10.9 | 110.2 | 3.5  | 92.9  | 7.9  |
| Phosmet          | 88.2  | 10.2 | 90.3  | 5.6  | 72.2  | 12.8 | 78.4  | 12.3 | 101.7 | 7.8  | 100.5 | 5.5  | 110.0 | 9.4  | 88.8  | 8.3  |

|                   |       |      |       |      |       |      |       |      |       |      |       |      |       |      |       |      |
|-------------------|-------|------|-------|------|-------|------|-------|------|-------|------|-------|------|-------|------|-------|------|
| Pirimicarb        | 115.7 | 13.4 | 103.2 | 10.9 | 96.5  | 5.8  | 79.0  | 11.8 | 118.9 | 9.5  | 83.4  | 10.2 | 116.6 | 10.2 | 93.6  | 12.8 |
| Pirimiphos-methyl | 99.0  | 4.9  | 105.4 | 6.2  | 87.7  | 10.0 | 103.1 | 5.9  | 102.1 | 6.7  | 117.2 | 13.0 | 87.4  | 9.4  | 92.2  | 6.9  |
| Pretilachlor      | 100.5 | 5.5  | 89.0  | 6.2  | 96.4  | 7.5  | 104.8 | 6.6  | 88.0  | 14.2 | 106.7 | 10.1 | 102.8 | 8.2  | 75.3  | 9.8  |
| Probenazole       | 83.4  | 10.2 | 92.8  | 4.6  | 93.5  | 5.6  | 92.3  | 5.3  | 93.0  | 7.9  | 86.4  | 8.8  | 99.3  | 8.0  | 72.8  | 10.6 |
| Procymidone       | 115.2 | 13.0 | 102.1 | 9.4  | 100.3 | 5.1  | 103.7 | 7.5  | 95.0  | 10.6 | 75.7  | 8.8  | 91.0  | 5.3  | 88.8  | 10.8 |
| Profenofos        | 106.7 | 10.1 | 105.7 | 7.3  | 79.2  | 10.5 | 112.9 | 8.5  | 106.7 | 10.1 | 105.7 | 7.3  | 81.4  | 8.3  | 78.0  | 5.3  |
| Prometryn         | 86.4  | 8.8  | 107.8 | 8.3  | 84.4  | 10.8 | 74.1  | 13.9 | 76.4  | 8.8  | 107.8 | 8.3  | 87.0  | 4.8  | 84.1  | 15.5 |
| Propachlor        | 75.7  | 8.8  | 102.6 | 8.2  | 103.0 | 8.8  | 98.5  | 5.1  | 79.7  | 8.8  | 102.6 | 8.2  | 99.9  | 4.2  | 99.7  | 5.3  |
| Propanil          | 102.8 | 6.5  | 107.7 | 7.1  | 72.4  | 12.3 | 105.4 | 11.4 | 102.8 | 6.5  | 107.7 | 7.1  | 94.8  | 6.5  | 102.7 | 10.3 |
| Propargite        | 108.5 | 10.9 | 98.1  | 5.3  | 89.0  | 11.8 | 107.3 | 6.2  | 94.9  | 9.4  | 112.3 | 7.3  | 95.4  | 8.3  | 89.0  | 6.8  |
| Propazine         | 118.1 | 3.6  | 101.7 | 7.8  | 105.8 | 8.5  | 92.6  | 4.7  | 80.9  | 5.6  | 99.1  | 3.8  | 83.1  | 10.2 | 97.0  | 7.1  |
| Propiconazol 1    | 86.1  | 5.0  | 110.9 | 9.5  | 94.6  | 5.6  | 112.6 | 13.3 | 82.5  | 7.5  | 98.8  | 5.1  | 97.8  | 8.2  | 106.0 | 6.7  |
| Propiconazol 2    | 105.5 | 8.7  | 102.1 | 6.7  | 84.8  | 8.5  | 95.1  | 5.5  | 99.8  | 5.5  | 105.7 | 6.2  | 73.0  | 9.2  | 99.1  | 6.4  |
| Propyzamide       | 107.1 | 10.1 | 88.0  | 14.2 | 78.9  | 9.6  | 82.7  | 8.2  | 90.4  | 5.9  | 105.9 | 5.9  | 72.4  | 13.5 | 102.2 | 5.1  |
| Pyraclonil        | 108.7 | 10.9 | 93.0  | 7.9  | 92.2  | 6.2  | 95.6  | 10.1 | 73.6  | 12.8 | 101.5 | 5.0  | 99.0  | 7.0  | 99.7  | 5.5  |
| Pyriproxyfen      | 104.8 | 12.5 | 95.0  | 10.6 | 89.0  | 10.9 | 98.5  | 6.1  | 82.8  | 7.5  | 93.0  | 11.0 | 90.9  | 7.4  | 100.4 | 7.2  |
| Quinalphos        | 110.2 | 3.5  | 92.9  | 7.9  | 87.1  | 13.1 | 77.2  | 12.2 | 106.4 | 7.1  | 92.9  | 5.7  | 76.7  | 9.7  | 106.0 | 7.9  |
| Quizalofop-ethyl  | 110.0 | 9.4  | 88.8  | 8.3  | 99.2  | 10.6 | 95.0  | 10.9 | 108.9 | 8.5  | 90.6  | 8.6  | 97.1  | 6.5  | 103.2 | 11.3 |
| Simetryn          | 93.0  | 11.0 | 82.5  | 7.5  | 79.6  | 12.4 | 98.9  | 3.2  | 86.8  | 13.1 | 116.6 | 10.2 | 90.5  | 12.3 | 90.9  | 6.3  |
| Spirodiclofen     | 92.9  | 5.7  | 99.8  | 5.5  | 87.9  | 9.4  | 86.1  | 8.3  | 109.3 | 13.6 | 87.4  | 9.4  | 98.0  | 13.5 | 83.4  | 10.1 |
| Sulfotep          | 90.6  | 8.6  | 90.4  | 5.9  | 102.1 | 7.9  | 76.2  | 8.2  | 104.2 | 7.0  | 102.8 | 8.2  | 98.8  | 10.6 | 89.5  | 8.2  |
| Tebuconazole      | 116.6 | 10.2 | 83.6  | 12.8 | 88.9  | 5.0  | 97.9  | 5.2  | 103.0 | 10.1 | 99.3  | 8.0  | 106.6 | 10.3 | 96.4  | 8.5  |
| Terbufos          | 87.4  | 9.4  | 92.2  | 6.9  | 83.0  | 10.2 | 80.4  | 10.2 | 102.1 | 6.6  | 91.0  | 5.3  | 101.3 | 5.8  | 88.1  | 5.9  |
| Tetramethrin 1    | 102.8 | 8.2  | 75.3  | 9.8  | 101.9 | 9.7  | 99.9  | 6.0  | 95.3  | 8.2  | 81.4  | 8.3  | 118.6 | 10.5 | 95.7  | 9.1  |

|                  |       |      |       |      |       |      |       |      |       |      |       |      |       |      |      |      |
|------------------|-------|------|-------|------|-------|------|-------|------|-------|------|-------|------|-------|------|------|------|
| Tetramethrin 2   | 99.3  | 8.0  | 72.8  | 10.6 | 118.7 | 7.2  | 93.1  | 4.4  | 102.8 | 8.2  | 75.3  | 9.8  | 111.7 | 11.4 | 83.0 | 6.3  |
| Thiifluzamide    | 91.0  | 5.3  | 88.8  | 10.8 | 98.4  | 6.2  | 86.1  | 12.5 | 99.3  | 8.0  | 72.8  | 10.6 | 119.5 | 12.0 | 88.3 | 10.5 |
| Thiobencarb      | 82.5  | 7.5  | 98.8  | 5.1  | 90.7  | 7.9  | 79.2  | 13.0 | 91.0  | 5.3  | 88.8  | 10.8 | 109.6 | 5.0  | 90.6 | 6.2  |
| Tolclofos-methyl | 99.8  | 5.5  | 105.7 | 6.2  | 110.6 | 9.9  | 71.5  | 7.9  | 81.4  | 8.3  | 78.0  | 5.3  | 94.6  | 4.6  | 85.7 | 7.7  |
| Tolfenpyrad      | 90.4  | 5.9  | 105.9 | 5.9  | 94.8  | 4.2  | 104.5 | 9.8  | 87.0  | 4.8  | 84.1  | 15.5 | 81.5  | 11.8 | 85.9 | 7.5  |
| Triadimefon      | 83.6  | 12.8 | 101.5 | 5.0  | 98.9  | 7.5  | 81.4  | 9.8  | 99.9  | 4.2  | 99.7  | 5.3  | 92.9  | 11.2 | 90.5 | 16.5 |
| Triadimenol      | 92.2  | 6.9  | 100.0 | 4.1  | 115.9 | 7.1  | 91.1  | 4.6  | 94.8  | 6.5  | 102.7 | 10.3 | 79.4  | 12.4 | 78.8 | 14.2 |
| Triallate        | 75.3  | 9.8  | 105.1 | 7.1  | 100.6 | 2.3  | 99.7  | 5.3  | 109.0 | 9.2  | 89.0  | 6.8  | 97.9  | 5.5  | 86.6 | 7.5  |
| Triazophos       | 72.8  | 10.6 | 104.5 | 7.0  | 80.4  | 10.2 | 102.7 | 10.3 | 98.2  | 7.5  | 76.2  | 9.7  | 93.7  | 6.2  | 92.3 | 5.1  |
| Trifloxystrobin  | 95.3  | 8.2  | 81.4  | 8.3  | 99.9  | 6.0  | 89.0  | 6.8  | 84.0  | 4.3  | 106.0 | 12.2 | 79.0  | 11.1 | 98.4 | 5.5  |
| Trifluralin      | 97.3  | 9.3  | 87.0  | 4.8  | 93.1  | 4.4  | 86.2  | 9.7  | 105.7 | 6.7  | 104.7 | 10.2 | 89.4  | 11.8 | 97.4 | 3.9  |
| Vinclozolin      | 106.0 | 12.2 | 99.9  | 4.2  | 86.1  | 12.5 | 84.0  | 5.0  | 97.0  | 10.6 | 105.4 | 4.2  | 99.5  | 6.3  | 82.2 | 7.5  |
| Zarilamid        | 104.7 | 10.2 | 94.8  | 6.5  | 90.4  | 3.8  | 71.1  | 8.8  | 85.8  | 4.4  | 100.5 | 9.6  | 103.5 | 7.1  | 98.2 | 10.3 |

---



Table S2. Recoveries (%) (n = 5) and repeatability (RSD %) from samples spiked at 10 µg kg<sup>-1</sup>, LOD, LOQ, correlation equation, R<sup>2</sup> of target pesticides in leek samples.

| Compounds    | Spiked 10 µg kg <sup>-1</sup> |      | LOD | LOQ  | Correlation equation  | R <sup>2</sup> | Compounds         | Spiked 10 µg kg <sup>-1</sup> |      | LOD | LOQ | Correlation equation   | R <sup>2</sup> |
|--------------|-------------------------------|------|-----|------|-----------------------|----------------|-------------------|-------------------------------|------|-----|-----|------------------------|----------------|
|              | Recovery                      |      |     |      |                       |                |                   | Recovery                      |      |     |     |                        |                |
|              | (%)                           | (%)  |     |      |                       |                |                   | (%)                           | (%)  |     |     |                        |                |
| Acetochlor   | 92.0                          | 11.3 | 2.6 | 8.0  | Y = 30594.4+2761.8*X  | 0.9998         | Haloxyfop-P       | 76.0                          | 12.9 | 0.3 | 1.0 | Y = 61868.7+11167.8*X  | 0.9989         |
| Alachlor     | 79.0                          | 6.1  | 2.0 | 6.0  | Y = 65135.6+8723.5*X  | 0.9996         | Imazalil          | 107.7                         | 9.1  | 1.7 | 5.0 | Y = 95978.9+19574.9*X  | 0.9994         |
| Aldrin       | 93.1                          | 7.9  | 2.0 | 6.0  | Y = 51909.7+7746.7*X  | 0.9998         | Irgarol 1051      | 79.3                          | 11.1 | 1.7 | 5.0 | Y = 84994.2+12101.6*X  | 0.9993         |
| Ametryn      | 90.2                          | 10.3 | 3.0 | 9.0  | Y = 30512.5+2345.4*X  | 1.0000         | Isocarbophos      | 75.5                          | 10.2 | 1.0 | 3.0 | Y = 184502+26031.5*X   | 0.9997         |
| Anilofos     | 81.2                          | 6.0  | 0.3 | 1.0  | Y = 13830.1+5966.6*X  | 0.9999         | Isodrin           | 84.6                          | 9.2  | 1.7 | 5.0 | Y = 12814.2+4428.5*X   | 0.9999         |
| Atrazine     | 94.8                          | 16.3 | 2.6 | 8.0  | Y = 23997.8+2883.5*X  | 0.9999         | Isofenphos-methyl | 79.6                          | 3.4  | 0.2 | 0.5 | Y = 599499.0+96476.3*X | 0.9994         |
| Azoxystrobin | 79.7                          | 11.7 | 2.0 | 6.0  | Y = 66644.0+20629.0*X | 0.9999         | Isoprocab         | 83.3                          | 9.9  | 1.7 | 5.0 | Y = -14729.9+13666.7*X | 1.0000         |
| Benfuracarb  | 74.9                          | 15.2 | 3.3 | 10.0 | Y = 27578.1+4390.7*X  | 0.9991         | Isoprothiolane    | 85.2                          | 16.2 | 1.7 | 5.0 | Y = 41899.1+4712.3*X   | 0.9988         |
| α-HCH        | 81.5                          | 6.6  | 0.3 | 1.0  | Y = 38458.7+10303.9*X | 0.9999         | Kresoxim-methyl   | 77.2                          | 18.4 | 2.0 | 6.0 | Y = 81510.9+15370.6*X  | 0.9993         |
| β- HCH       | 92.5                          | 11.1 | 1.7 | 5.0  | Y = 34329.9+11185.6*X | 0.9995         | Malathion         | 84.9                          | 7.9  | 1.7 | 5.0 | Y = 64864.6+5496.8*X   | 0.9988         |
| γ-HCH        | 77.2                          | 12.1 | 2.6 | 8.0  | Y = -18044.0+3102.4*X | 0.9996         | Mefenacet         | 84.7                          | 3.1  | 1.7 | 5.0 | Y = 278460.0+64675.4*X | 0.9997         |

|                      |       |      |      |      |                         |        |                |       |      |     |      |                         |        |
|----------------------|-------|------|------|------|-------------------------|--------|----------------|-------|------|-----|------|-------------------------|--------|
| δ- HCH               | 82.1  | 6.6  | 0.5  | 1.0  | Y = 75644.9+28675.7*X   | 0.9999 | Mepronil       | 75.8  | 12.2 | 1.0 | 3.0  | Y = 97989.8+21505.2*X   | 0.9994 |
| Bifenox              | 85.9  | 7.2  | 3.3  | 10.0 | Y = -14938.3+4490.1*X   | 0.9998 | Metazachlor    | 79.4  | 11.8 | 0.7 | 2.0  | Y = 49319.2+14334.6*X   | 0.9991 |
| Bifenthrin           | 79.1  | 11.2 | 0.3  | 1.0  | Y = 1113580.0+63831.2*X | 0.9997 | Methidathion   | 102.6 | 13.2 | 2.0 | 6.0  | Y = 56677.4+5499.0*X    | 0.9999 |
| Boscalid             | 81.4  | 6.5  | 0.03 | 0.1  | Y = 2772.0+18780.5*X    | 1.0000 | Metribuzin     | 83.3  | 2.3  | 1.0 | 3.0  | Y = 23890.9+9988.6*X    | 0.9999 |
| Bromobutide          | 110.5 | 15.5 | 2.0  | 6.0  | Y = 18222.9+2646.6*X    | 0.9998 | Monocrotophos  | 74.9  | 13.4 | 3.3 | 10.0 | Y = 203592.0+10898.2*X  | 0.9997 |
| Bromoxynil           | 79.2  | 18.4 | 3.3  | 10.0 | Y = 43439.6+910.1*X     | 0.9995 | Myclobutanil   | 92.4  | 10.6 | 1.0 | 3.0  | Y = 167912.0+30794.0*X  | 0.9993 |
| Buprofezin           | 82.2  | 14.5 | 2.0  | 6.0  | Y = 69484.0+8285.5*X    | 0.9979 | Napropamide    | 80.5  | 10.7 | 2.6 | 8.0  | Y = 72788.1+6988.5*X    | 0.9999 |
| Butachlor            | 73.8  | 15.2 | 1.7  | 5.0  | Y = 55625.0+5913.1*X    | 0.9982 | Norflurazon    | 86.9  | 3.0  | 1.7 | 5.0  | Y = 40033.2+23723.2*X   | 1.0000 |
| Butralin             | 96.9  | 11.2 | 0.3  | 1.0  | Y = 25274.7+3120.2*X    | 0.9933 | o,p'-DDD       | 74.8  | 8.4  | 0.3 | 1.0  | Y = 638683.0+111267.0*X | 0.9997 |
| Carbophenothion      | 99.7  | 5.9  | 1.0  | 3.0  | Y = -26540.8+11413.2*X  | 0.9999 | o,p'-DDE       | 84.4  | 5.8  | 0.3 | 1.0  | Y = 401085.0+79473.6*X  | 0.9994 |
| Carboxin             | 86.8  | 8.1  | 1.7  | 5.0  | Y = 115070.0+25631.6*X  | 0.9998 | o,p'-DDT       | 88.4  | 5.2  | 1.7 | 5.0  | Y = 553920.0+151316.0*X | 0.9999 |
| Chlorfenapyr         | 74.8  | 18.4 | 3.3  | 10.0 | Y = 21503.5+2490.6*X    | 1.0000 | Oxadiazon      | 81.1  | 15.9 | 1.0 | 3.0  | Y = 72163.0+24212.8*X   | 1.0000 |
| Chlorfluazuron       | 85.4  | 7.9  | 2.0  | 6.0  | Y = 1423.0+4718.9*X     | 0.9990 | Oxadixyl       | 86.1  | 12.7 | 0.2 | 0.5  | Y = 36201.6+16692.3*X   | 0.9999 |
| Chlorpropham         | 92.1  | 14.3 | 1.7  | 5.0  | Y = 27146.9+6258.0*X    | 0.9997 | Oxaziclomefone | 105.4 | 8.8  | 1.0 | 3.0  | Y = -36543.5+5563.0*X   | 0.9993 |
| Chlorpyrifos         | 70.2  | 10.4 | 0.03 | 0.1  | Y = 208307.0+14361.1*X  | 0.9992 | Oxyfluorfen    | 111.8 | 15.2 | 0.3 | 1.0  | Y = 31897.1+6376.2*X    | 0.9920 |
| Clodinafop-propargyl | 73.1  | 7.2  | 0.3  | 1.0  | Y = 14117.7+11795.7*X   | 0.9999 | p,p'-DDD       | 82.5  | 8.9  | 1.7 | 5.0  | Y = 732503.0+170488.0*X | 0.9997 |

|                |       |      |     |      |                        |        |                   |       |      |     |      |                        |        |
|----------------|-------|------|-----|------|------------------------|--------|-------------------|-------|------|-----|------|------------------------|--------|
| Clomazone      | 93.8  | 8.1  | 0.3 | 1.0  | Y = 28079.6+16651.2*X  | 0.9999 | p,p'-DDE          | 77.2  | 5.7  | 0.2 | 0.5  | Y = 193701.0+76411.1*X | 0.9996 |
| Coumaphos      | 77.4  | 7.8  | 1.7 | 5.0  | Y = -51225.8+8571.5*X  | 0.9988 | p,p'-DDT          | 86.4  | 8.6  | 2.0 | 6.0  | Y = -36864.7+19358.2*X | 0.9998 |
| Cycloxydim     | 90.0  | 3.8  | 1.7 | 5.0  | Y = -15595.6+7020.6*X  | 0.9997 | Parathion         | 82.7  | 10.4 | 2.6 | 8.0  | Y = 98832.4+8191.0*X   | 0.9994 |
| Cyfluthrin 1   | 80.4  | 8.2  | 2.6 | 8.0  | Y = 244468.0+2245.5*X  | 0.9965 | Parathion-methyl  | 91.5  | 7.6  | 1.0 | 3.0  | Y = -5332.3+6736.2*X   | 0.9999 |
| Cyfluthrin 2   | 90.1  | 7.9  | 2.6 | 8.0  | Y = 123617.0+4135.3*X  | 0.9998 | Penconazole       | 77.3  | 7.2  | 0.2 | 0.5  | Y = 101101.0+16193.4*X | 0.9989 |
| Cyfluthrin 3   | 89.7  | 7.0  | 2.6 | 8.0  | Y = 54008.9+1259.2*X   | 0.9996 | Pendimethalin     | 86.4  | 12.1 | 0.3 | 1.0  | Y = 155725.0+6416.9*X  | 0.9996 |
| Cyfluthrin 4   | 105.7 | 9.1  | 2.6 | 8.0  | Y = 33460.7+1391.4*X   | 0.9996 | Permethrin 1      | 78.8  | 5.9  | 3.3 | 10.0 | Y = 102042.0+7814.6*X  | 0.9995 |
| Cyhalothrin 1  | 75.4  | 10.8 | 2.6 | 8.0  | Y = 710252.0+36153.3*X | 1.0000 | Permethrin 2      | 82.6  | 7.8  | 3.3 | 10.0 | Y = 84841.4+10914.2*X  | 0.9996 |
| Cyhalothrin 2  | 82.9  | 6.0  | 2.6 | 8.0  | Y = 285200.0+48864.3*X | 1.0000 | Phenthoate        | 89.0  | 6.5  | 0.2 | 0.5  | Y = 41071.7+3645.8*X   | 0.9974 |
| Cypermethrin 1 | 89.4  | 5.9  | 2.6 | 8.0  | Y = 45121.4+4021.3*X   | 0.9993 | Phorate           | 108.5 | 19.5 | 1.7 | 5.0  | Y = 2885.1+1754.7*X    | 0.9997 |
| Cypermethrin 2 | 82.6  | 8.3  | 2.6 | 8.0  | Y = 34449.5+3876.7*X   | 0.9993 | Phosalone         | 89.2  | 10.5 | 2.6 | 8.0  | Y = 82350.3+12499.7*X  | 0.9999 |
| Cypermethrin 3 | 104.7 | 7.8  | 2.6 | 8.0  | Y = 84679.3+6553.9*X   | 0.9993 | Phosmet           | 82.8  | 15.9 | 2.6 | 8.0  | Y = 59888.7+1371.2*X   | 0.9991 |
| Cypermethrin 4 | 83.8  | 5.5  | 2.6 | 8.0  | Y = 131.30+7021.2*X    | 0.9999 | Pirimicarb        | 79.3  | 17.9 | 1.7 | 5.0  | Y = 20455.3+5878.0*X   | 0.9998 |
| Cyproconazole  | 72.4  | 10.9 | 0.3 | 1.0  | Y = 130374.0+29509.0*X | 0.9992 | Pirimiphos-methyl | 121.1 | 10.1 | 0.3 | 1.0  | Y = 29500.4+6260.2*X   | 0.9996 |
| Cyprodinil     | 44.8  | 6.9  | 1.7 | 5.0  | Y = 224573.0+26923.6*X | 0.9992 | Pretilachlor      | 72.3  | 14.0 | 1.0 | 3.0  | Y = 120583.0+18066.0*X | 0.9994 |
| Deltamethrin   | 83.6  | 8.2  | 3.3 | 10.0 | Y = 9659.20+6547.1*X   | 0.9999 | Probenazole       | 78.3  | 15.2 | 3.3 | 10.0 | Y = 13960.1+2953.4*X   | 0.9992 |

|                      |       |      |     |      |                              |        |                  |       |      |     |     |                              |        |
|----------------------|-------|------|-----|------|------------------------------|--------|------------------|-------|------|-----|-----|------------------------------|--------|
| Diafenthuron         | 58.8  | 15.7 | 1.7 | 5.0  | $Y = -20194.3 + 6494.1 * X$  | 0.9987 | Procymidone      | 100.2 | 9.6  | 1.0 | 3.0 | $Y = 15249.8 + 2802.8 * X$   | 0.9992 |
| Diazinon             | 89.6  | 10.5 | 1.7 | 5.0  | $Y = 30641.6 + 4444.6 * X$   | 0.9996 | Profenofos       | 84.7  | 10.6 | 1.7 | 5.0 | $Y = -22531.8 + 3965.0 * X$  | 0.9997 |
| Diclofop-methyl      | 89.9  | 2.8  | 1.0 | 3.0  | $Y = 53626.0 + 38249.9 * X$  | 0.9999 | Prometryn        | 91.0  | 6.4  | 1.0 | 3.0 | $Y = 30161.6 + 13591.6 * X$  | 0.9999 |
| Dieldrin             | 70.6  | 11.3 | 1.7 | 5.0  | $Y = -1663.6 + 3551.1 * X$   | 0.9996 | Propachlor       | 88.4  | 10.3 | 1.7 | 5.0 | $Y = 23912.2 + 3931.9 * X$   | 0.9996 |
| Diethofencarb        | 73.7  | 5.8  | 1.7 | 5.0  | $Y = 69827.3 + 9532.6 * X$   | 0.9981 | Propanil         | 91.0  | 10.0 | 2.6 | 8.0 | $Y = 14763.2 + 15189.3 * X$  | 0.9999 |
| Difenzoquat          | 112.9 | 10.5 | 1.7 | 5.0  | $Y = 47200.9 + 31407.5 * X$  | 0.9999 | Propargite       | 113.4 | 15.2 | 1.7 | 5.0 | $Y = -5952.8 + 2947.6 * X$   | 0.9960 |
| Diflufenican         | 52.7  | 9.4  | 0.3 | 1.0  | $Y = 151759.0 + 27120.3 * X$ | 0.9998 | Propazine        | 77.3  | 7.5  | 1.7 | 5.0 | $Y = 62574.5 + 16106.7 * X$  | 0.9998 |
| $\alpha$ -endosulfan | 108.4 | 14.7 | 1.0 | 3.0  | $Y = 11912.7 + 1929.9 * X$   | 0.9963 | Propiconazol 1   | 98.9  | 13.7 | 1.7 | 5.0 | $Y = -15595.4 + 5702.3 * X$  | 0.9998 |
| $\beta$ -endosulfan  | 103.6 | 8.7  | 1.7 | 5.0  | $Y = -15720.9 + 1643.4 * X$  | 1.0000 | Propiconazol 2   | 90.5  | 10.5 | 1.7 | 5.0 | $Y = 21801.6 + 5715.8 * X$   | 0.9997 |
| Endrin               | 80.3  | 10.5 | 1.7 | 5.0  | $Y = 29154.9 + 2227.5 * X$   | 0.9995 | Propyzamide      | 97.6  | 9.8  | 1.7 | 5.0 | $Y = 205561.0 + 33251.9 * X$ | 0.9995 |
| Ethofumesate         | 94.6  | 15.8 | 3.3 | 10.0 | $Y = 43669.0 + 3781.0 * X$   | 1.0000 | Pyraclonil       | 70.9  | 13.5 | 2.6 | 8.0 | $Y = 40088.0 + 4359.8 * X$   | 0.9993 |
| Etridiazole          | 95.3  | 6.0  | 0.3 | 1.0  | $Y = 925.4 + 4084.1 * X$     | 1.0000 | Pyriproxyfen     | 86.0  | 5.2  | 2.0 | 6.0 | $Y = 11545.1 + 16106.6 * X$  | 0.9997 |
| Famoxadone           | 79.4  | 12.5 | 3.3 | 10.0 | $Y = 3996.0 + 7671.1 * X$    | 0.9997 | Quinalphos       | 73.7  | 9.6  | 1.0 | 3.0 | $Y = 188965.0 + 33679.2 * X$ | 0.9996 |
| Fenarimol            | 93.6  | 10.1 | 2.0 | 6.0  | $Y = 52196.9 + 22130.0 * X$  | 0.9997 | Quizalofop-ethyl | 78.3  | 3.4  | 1.0 | 3.0 | $Y = 49939.7 + 28026.1 * X$  | 0.9999 |
| Fenazaquin           | 85.0  | 5.5  | 2.6 | 8.0  | $Y = 288047.0 + 89536.0 * X$ | 0.9999 | Simetryn         | 99.1  | 11.6 | 1.0 | 3.0 | $Y = 41004.9 + 8863.0 * X$   | 0.9999 |
| Fenbuconazole        | 96.9  | 2.6  | 1.0 | 3.0  | $Y = 85133.1 + 44963.0 * X$  | 0.9999 | Spirodiclofen    | 75.6  | 8.2  | 0.2 | 0.5 | $Y = 19633.0 + 2336.3 * X$   | 0.9989 |

|                   |       |      |      |      |                               |        |                  |       |      |      |      |                              |        |
|-------------------|-------|------|------|------|-------------------------------|--------|------------------|-------|------|------|------|------------------------------|--------|
| Fenitrothion      | 82.1  | 13.5 | 1.7  | 5.0  | $Y = -2468.5 + 2059.1 * X$    | 0.9989 | Sulfotep         | 121.4 | 2.3  | 0.3  | 1.0  | $Y = 38090.6 + 8749.1 * X$   | 0.9996 |
| Fenobucarb        | 80.8  | 5.3  | 1.7  | 5.0  | $Y = 21221.9 + 13196.2 * X$   | 1.0000 | Tebuconazole     | 81.3  | 4.0  | 0.2  | 0.5  | $Y = 92475.8 + 19199.9 * X$  | 0.9999 |
| Fenoxaprop-P      | 75.8  | 12.8 | 0.2  | 0.5  | $Y = 92198.3 + 47600.0 * X$   | 0.9999 | Terbufos         | 90.4  | 7.2  | 0.3  | 1.0  | $Y = 9423.6 + 1866.4 * X$    | 0.9997 |
| Fenpropathrin     | 126.0 | 12.8 | 3.3  | 10.0 | $Y = 1016750.0 + 45428.8 * X$ | 0.9999 | Tetramethrin 1   | 92.9  | 8.8  | 3.3  | 10.0 | $Y = 29474.0 + 2683.4 * X$   | 0.9989 |
| Fenthion          | 98.4  | 9.4  | 1.7  | 5.0  | $Y = -8312.9 + 1551.8 * X$    | 0.9968 | Tetramethrin 2   | 90.5  | 10.3 | 3.3  | 10.0 | $Y = 140190.0 + 11217.3 * X$ | 0.9993 |
| Fipronil          | 75.4  | 11.4 | 0.3  | 1.0  | $Y = 95066.1 + 13066.1 * X$   | 0.9991 | Thifluzamide     | 87.3  | 11.2 | 1.0  | 3.0  | $Y = 222885.0 + 41155.8 * X$ | 0.9998 |
| Fluazifop-P-butyl | 90.7  | 9.0  | 0.03 | 0.1  | $Y = 32301.6 + 14917.4 * X$   | 1.0000 | Thiobencarb      | 110.5 | 10.3 | 1.7  | 5.0  | $Y = 20733.6 + 2655.2 * X$   | 0.9990 |
| Fludioxonil       | 87.5  | 11.6 | 2.6  | 8.0  | $Y = 119880.0 + 19960.1 * X$  | 0.9992 | Tolclofos-methyl | 100.8 | 9.4  | 1.0  | 3.0  | $Y = 52361.1 + 24470.2 * X$  | 0.9999 |
| Flufenoxuron      | 80.6  | 16.8 | 1.7  | 5.0  | $Y = 2641.9 + 3029.5 * X$     | 0.9997 | Tolfenpyrad      | 96.1  | 10.4 | 0.1  | 0.3  | $Y = 110311.0 + 23276.8 * X$ | 0.9997 |
| Flumioxazin       | 88.0  | 5.1  | 2.0  | 6.0  | $Y = 17068.9 + 7247.0 * X$    | 1.0000 | Triadimefon      | 74.4  | 10.9 | 1.0  | 3.0  | $Y = 235206.0 + 35802.5 * X$ | 0.9998 |
| Fluorochloridone  | 92.1  | 10.5 | 2.0  | 6.0  | $Y = 43142.4 + 5959.9 * X$    | 0.9996 | Triadimenol      | 89.3  | 9.4  | 0.03 | 0.1  | $Y = 960562.0 + 8463.4 * X$  | 0.9997 |
| Fluoroglycofen    | 114.5 | 8.6  | 2.6  | 8.0  | $Y = -24423.1 + 1039.3 * X$   | 1.0000 | Triallate        | 71.7  | 10.8 | 0.3  | 1.0  | $Y = 97996.0 + 8279.5 * X$   | 0.9953 |
| Fluroxypyr        | 116.8 | 8.3  | 3.3  | 10.0 | $Y = 7116.9 + 1148.6 * X$     | 0.9988 | Triazophos       | 74.3  | 12.6 | 1.0  | 3.0  | $Y = 24794.4 + 7136.9 * X$   | 0.9995 |
| Flusilazole       | 82.8  | 8.7  | 0.7  | 2.0  | $Y = 139670.0 + 16040.1 * X$  | 0.9993 | Trifloxystrobin  | 82.3  | 2.8  | 1.7  | 5.0  | $Y = 286577.0 + 46326.5 * X$ | 0.9996 |
| Flutolanil        | 93.3  | 5.8  | 0.7  | 2.0  | $Y = 422115.0 + 167660.0 * X$ | 0.9999 | Trifluralin      | 107.8 | 11.3 | 0.3  | 1.0  | $Y = 8444.6 + 6809.3 * X$    | 0.9998 |
| Fomesafen         | 76.3  | 18.0 | 3.3  | 10.0 | $Y = 992.4 + 2356.7 * X$      | 0.9996 | Vinclozolin      | 96.9  | 10.2 | 1.7  | 5.0  | $Y = 11614.2 + 3927.6 * X$   | 0.9994 |

|         |      |     |     |      |                                |        |           |      |      |     |      |                                |        |
|---------|------|-----|-----|------|--------------------------------|--------|-----------|------|------|-----|------|--------------------------------|--------|
| Fonofos | 82.7 | 6.1 | 3.3 | 10.0 | $Y = -9182.0 + 2671.5 \cdot X$ | 1.0000 | Zarilamid | 77.0 | 14.6 | 3.3 | 10.0 | $Y = 81555.1 + 8413.4 \cdot X$ | 1.0000 |
|---------|------|-----|-----|------|--------------------------------|--------|-----------|------|------|-----|------|--------------------------------|--------|

Table S3. Pesticides detected in fruits and vegetables from Shandong, China.

| Pesticides   | Mean value<br>(mg kg <sup>-1</sup> ) | Range<br>(min-max)      | No. of<br>detected<br>samples | No.of<br>samples≥<br>MRL (%) | Pesticides        | Mean value<br>(mg kg <sup>-1</sup> ) | Range<br>(min-max) | No. of<br>detected<br>samples | No.of<br>samples≥<br>MRL (%) |
|--------------|--------------------------------------|-------------------------|-------------------------------|------------------------------|-------------------|--------------------------------------|--------------------|-------------------------------|------------------------------|
| Acetochlor   | 0.278                                | <DL <sup>a</sup> -0.864 | 21(6.7%)                      | 0(0.0%)                      | γ- HCH            | <DL                                  | <DL                | 0(0.0%)                       | 0(0.0%)                      |
| Alachlor     | 0.013                                | <DL-0.013               | 1(0.3%)                       | 0(0.0%)                      | δ- HCH            | <DL                                  | <DL                | 0(0.0%)                       | 0(0.0%)                      |
| Aldrin       | <DL                                  | <DL                     | 0(0.0%)                       | 0(0.0%)                      | Imazalil          | <DL                                  | <DL                | 0(0.0%)                       | 0(0.0%)                      |
| Ametryn      | 0.007                                | <DL-0.007               | 1(0.3%)                       | 0(0.0%)                      | Isocarbophos      | <DL                                  | <DL                | 0(0.0%)                       | 0(0.0%)                      |
| Anilofos     | 0.009                                | <DL-0.019               | 6(1.9%)                       | 0(0.0%)                      | Isodrin           | 0.021                                | <DL-0.022          | 2(0.6%)                       | 0(0.0%)                      |
| Atrazine     | 0.008                                | <DL-0.116               | 12(3.8%)                      | 0(0.0%)                      | Isofenphos-methyl | <DL                                  | <DL                | 0(0.0%)                       | 0(0.0%)                      |
| Azoxystrobin | 0.041                                | <DL-0.105               | 14(4.5%)                      | 0(0.0%)                      | Isoprothiolane    | <DL                                  | <DL                | 0(0.0%)                       | 0(0.0%)                      |
| Benfuracarb  | <DL                                  | <DL                     | 0(0.0%)                       | 0(0.0%)                      | Kresoxim-methyl   | 0.026                                | <DL-0.133          | 5(1.6%)                       | 0(0.0%)                      |
| Cypermethrin | 0.039                                | <DL-2.344               | 19(6.1%)                      | 2(0.6%)                      | Malathion         | <DL                                  | <DL                | 0(0.0%)                       | 0(0.0%)                      |
| Bifenox      | <DL                                  | <DL                     | 0(0.0%)                       | 0(0.0%)                      | Mefenacet         | 0.008                                | <DL-0.014          | 19(6.1%)                      | 0(0.0%)                      |
| Bifenthrin   | 0.031                                | <DL-0.173               | 18(5.7%)                      | 0(0.0%)                      | Mepronil          | 0.014                                | <DL-0.052          | 26(8.3%)                      | 0(0.0%)                      |
| Boscalid     | 0.013                                | <DL-0.492               | 54(17.2%)                     | 0(0.0%)                      | Metazachlor       | <DL                                  | <DL                | 0(0.0%)                       | 0(0.0%)                      |
| Bromobutide  | <DL                                  | <DL                     | 0(0.0%)                       | 0(0.0%)                      | Methidathion      | 0.009                                | <DL-0.021          | 7(2.2%)                       | 0(0.0%)                      |

|                      |       |           |           |         |                  |       |           |          |         |
|----------------------|-------|-----------|-----------|---------|------------------|-------|-----------|----------|---------|
| Bromoxynil           | 0.019 | <DL-0.036 | 26(8.3%)  | 0(0.0%) | Metribuzin       | <DL   | <DL       | 0(0.0%)  | 0(0.0%) |
| Buprofezin           | <DL   | <DL       | 0(0.0%)   | 0(0.0%) | Monocrotophos    | <DL   | <DL       | 0(0.0%)  | 0(0.0%) |
| Butachlor            | 0.043 | <DL-0.132 | 31(9.9%)  | 0(0.0%) | Myclobutanil     | 0.028 | <DL-0.842 | 10(3.2%) | 0(0.0%) |
| Butralin             | 0.007 | <DL-0.007 | 1(0.3%)   | 0(0.0%) | Napropamide      | <DL   | <DL       | 0(0.0%)  | 0(0.0%) |
| Carbophenothion      | <DL   | <DL       | 0(0.0%)   | 0(0.0%) | Norflurazon      | <DL   | <DL       | 0(0.0%)  | 0(0.0%) |
| Carboxin             | <DL   | <DL       | 0(0.0%)   | 0(0.0%) | O,P-DDE          | 0.006 | <DL-0.006 | 1(0.3%)  | 0(0.0%) |
| Chlorfenapyr         | 2.853 | <DL-2.853 | 1(0.3%)   | 0(0.0%) | O,P'-DDT         | 0.016 | <DL-0.016 | 1(0.3%)  | 0(0.0%) |
| Chlorfluazuron       | <DL   | <DL       | 0(0.0%)   | 0(0.0%) | Oxadiazon        | <DL   | <DL       | 0(0.0%)  | 0(0.0%) |
| Chlorpropham         | 0.010 | <DL-0.01  | 1(0.3%)   | 0(0.0%) | Oxadixyl         | <DL   | <DL       | 0(0.0%)  | 0(0.0%) |
| chlorpyrifos         | 0.016 | <DL-0.933 | 58(18.5%) | 1(0.3%) | Oxaziclomefone   | <DL   | <DL       | 0(0.0%)  | 0(0.0%) |
| Clodinafop-propargyl | 0.066 | <DL-0.066 | 1(0.3%)   | 0(0.0%) | Oxyfluorfen      | 0.060 | <DL-0.188 | 7(2.2%)  | 0(0.0%) |
| Clomazone            | <DL   | <DL       | 0(0.0%)   | 0(0.0%) | P,P'-DDD         | <DL   | <DL       | 0(0.0%)  | 0(0.0%) |
| Coumaphos            | <DL   | <DL       | 0(0.0%)   | 0(0.0%) | P,P'-DDT         | 0.042 | <DL-0.042 | 1(0.3%)  | 0(0.0%) |
| Cybutryne            | 0.030 | <DL-0.03  | 1(0.3%)   | 0(0.0%) | Parathion        | <DL   | <DL       | 0(0.0%)  | 0(0.0%) |
| Cycloxydim           | <DL   | <DL       | 0(0.0%)   | 0(0.0%) | Parathion-methyl | <DL   | <DL       | 0(0.0%)  | 0(0.0%) |
| Cyfluthrin           | 0.026 | <DL-1.389 | 29(9.2%)  | 0(0.0%) | Penconazole      | <DL   | <DL       | 0(0.0%)  | 0(0.0%) |



|                      |       |           |          |         |                   |       |           |           |         |
|----------------------|-------|-----------|----------|---------|-------------------|-------|-----------|-----------|---------|
| Cyhalothrin          | 0.014 | <DL-0.079 | 16(5.1%) | 0(0.0%) | Pendimethalin     | 0.023 | <DL-0.041 | 25(8.0%)  | 0(0.0%) |
| Cyproconazole        | <DL   | <DL       | 0(0.0%)  | 0(0.0%) | Permethrin        | <DL   | <DL       | 0(0.0%)   | 0(0.0%) |
| Cyprodinil           | 0.040 | <DL-0.04  | 1(0.3%)  | 0(0.0%) | Phenthoate        | 0.014 | <DL-0.014 | 1(0.3%)   | 0(0.0%) |
| Deltamethrin         | 0.015 | <DL-0.081 | 13(4.1%) | 0(0.0%) | Phorate           | <DL   | <DL       | 0(0.0%)   | 0(0.0%) |
| Diafenthiuron        | <DL   | <DL       | 0(0.0%)  | 0(0.0%) | Phosalone         | <DL   | <DL       | 0(0.0%)   | 0(0.0%) |
| Diazinon             | <DL   | <DL       | 0(0.0%)  | 0(0.0%) | Phosmet           | <DL   | <DL       | 0(0.0%)   | 0(0.0%) |
| Diclofop-methyl      | 0.018 | <DL-0.018 | 1(0.3%)  | 0(0.0%) | Pirimicarb        | 0.006 | <DL-0.006 | 19(6.1%)  | 0(0.0%) |
| Dieldrin             | <DL   | <DL       | 0(0.0%)  | 0(0.0%) | Pirimiphos-methyl | <DL   | <DL       | 0(0.0%)   | 0(0.0%) |
| Diethofencarb        | 0.102 | <DL-2.162 | 18(5.7%) | 0(0.0%) | Pretilachlor      | <DL   | <DL       | 0(0.0%)   | 0(0.0%) |
| Difenzoquat          | 0.196 | <DL-0.196 | 1(0.3%)  | 0(0.0%) | Probenazole       | 0.009 | <DL-2.079 | 42(13.4%) | 0(0.0%) |
| Diflufenican         | <DL   | <DL       | 0(0.0%)  | 0(0.0%) | Procymidone       | 0.042 | <DL-11.27 | 64(20.4%) | 4(1.3%) |
| $\alpha$ -endosulfan | <DL   | <DL       | 0(0.0%)  | 0(0.0%) | Profenofos        | 0.075 | <DL-0.114 | 14(4.5%)  | 0(0.0%) |
| $\beta$ -endosulfan  | <DL   | <DL       | 0(0.0%)  | 0(0.0%) | Prometryn         | 0.006 | <DL-0.018 | 8(2.5%)   | 0(0.0%) |
| Endrin               | 0.007 | <DL-0.008 | 2(0.6%)  | 0(0.0%) | Propachlor        | 0.113 | <DL-0.118 | 2(0.6%)   | 0(0.0%) |
| Ethofumesate         | <DL   | <DL       | 0(0.0%)  | 0(0.0%) | Propargite        | 0.006 | <DL-0.006 | 1(0.3%)   | 0(0.0%) |
| Etridiazole          | 0.012 | <DL-0.02  | 8(2.5%)  | 0(0.0%) | Propazine         | <DL   | <DL       | 0(0.0%)   | 0(0.0%) |

|                    |       |           |          |         |                  |       |           |           |         |
|--------------------|-------|-----------|----------|---------|------------------|-------|-----------|-----------|---------|
| Famoxadone         | 0.044 | <DL-0.072 | 21(6.7%) | 0(0.0%) | Propiconazole    | 0.049 | <DL-0.118 | 10(3.2%)  | 0(0.0%) |
| Fenarimol          | 0.010 | <DL-0.014 | 4(1.3%)  | 0(0.0%) | Propyzamide      | <DL   | <DL       | 0(0.0%)   | 0(0.0%) |
| Fenazaquin         | 0.000 | <DL       | 0(0.0%)  | 0(0.0%) | Pyraclonil       | <DL   | <DL       | 0(0.0%)   | 0(0.0%) |
| Fenbuconazole      | 0.017 | <DL-0.027 | 6(1.9%)  | 0(0.0%) | Pyriproxyfen     | 0.028 | <DL-0.071 | 36(11.5%) | 0(0.0%) |
| Fenitrothion       | <DL   | <DL       | 0(0.0%)  | 0(0.0%) | Quinalphos       | 0.010 | <DL-0.012 | 2(0.6%)   | 0(0.0%) |
| Fenobucarb         | 0.050 | <DL-0.085 | 4(1.3%)  | 0(0.0%) | Quizalofop       | 0.040 | <DL-0.04  | 1(0.3%)   | 0(0.0%) |
| Fenoxaprop-P-ethyl | <DL   | <DL       | 0(0.0%)  | 0(0.0%) | Simetryn         | <DL   | <DL       | 0(0.0%)   | 0(0.0%) |
| Fenpropathrin      | 0.054 | <DL-0.076 | 27(8.6%) | 0(0.0%) | Spirodiclofen    | 0.502 | <DL-0.957 | 5(1.6%)   | 0(0.0%) |
| Fipronil           | 0.005 | <DL-0.005 | 1(0.3%)  | 0(0.0%) | Sulfotep         | <DL   | <DL       | 0(0.0%)   | 0(0.0%) |
| Fenthion           | 0.007 | <DL-0.007 | 1(0.3%)  | 0(0.0%) | Tebuconazole     | 0.011 | <DL-1.599 | 69(22.0%) | 0(0.0%) |
| Fenvalerate        | <DL   | <DL       | 0(0.0%)  | 0(0.0%) | Terbufos         | <DL   | <DL       | 0(0.0%)   | 0(0.0%) |
| Fluazifop-P-butyl  | 0.529 | <DL-6.308 | 15(4.8%) | 0(0.0%) | Tetramethrin     | <DL   | <DL       | 0(0.0%)   | 0(0.0%) |
| Fludioxonil        | <DL   | <DL       | 0(0.0%)  | 0(0.0%) | Thifluzamide     | <DL   | <DL       | 0(0.0%)   | 0(0.0%) |
| Flufenoxuron       | <DL   | <DL       | 0(0.0%)  | 0(0.0%) | Thiobencarb      | <DL   | <DL       | 0(0.0%)   | 0(0.0%) |
| Flumioxazin        | <DL   | <DL       | 0(0.0%)  | 0(0.0%) | Tolclofos-methyl | <DL   | <DL       | 0(0.0%)   | 0(0.0%) |
| Fluorochloridone   | 0.177 | <DL-1.781 | 10(3.2%) | 0(0.0%) | Tolfenpyrad      | 0.006 | <DL-0.006 | 1(0.3%)   | 0(0.0%) |

|                    |       |           |         |         |                 |       |           |           |         |
|--------------------|-------|-----------|---------|---------|-----------------|-------|-----------|-----------|---------|
| Fluoroglycofen     | <DL   | <DL       | 0(0.0%) | 0(0.0%) | Triadimefon     | 0.028 | <DL-0.079 | 6(1.9%)   | 0(0.0%) |
| Fluroxypyr         | 0.007 | <DL-0.057 | 6(1.9%) | 0(0.0%) | Triadimenol     | 0.101 | <DL-0.510 | 51(16.2%) | 2(0.6%) |
| Flusilazole        | 0.009 | <DL-0.012 | 4(1.3%) | 0(0.0%) | Triallate       | 0.006 | <DL-0.006 | 1(0.3%)   | 0(0.0%) |
| Flutolanil         | 0.006 | <DL-0.006 | 1(0.3%) | 0(0.0%) | Triazophos      | <DL   | <DL       | 0(0.0%)   | 0(0.0%) |
| Fomesafen          | <DL   | <DL       | 0(0.0%) | 0(0.0%) | Trifloxystrobin | 0.020 | <DL-0.119 | 10(3.2%)  | 0(0.0%) |
| Fonofos            | <DL   | <DL       | 0(0.0%) | 0(0.0%) | Trifluralin     | 0.038 | <DL-0.077 | 8(2.5%)   | 0(0.0%) |
| Haloxypop-P-methyl | <DL   | <DL       | 0(0.0%) | 0(0.0%) | Vinclozolin     | <DL   | <DL       | 0(0.0%)   | 0(0.0%) |
| α- HCH             | <DL   | <DL       | 0(0.0%) | 0(0.0%) | Zarilamid       | 0.018 | <DL-0.018 | 1(0.3%)   | 0(0.0%) |
| β- HCH             | <DL   | <DL       | 0(0.0%) | 0(0.0%) |                 |       |           |           |         |

<sup>a</sup> Detection limit

Table S4. MRM Transitions and Other GC-MS/MS Parameters for the Compounds.

| Pesticides      | RT(min) | Quantification transition<br>(Collision energy (eV)) | Confirmation transition<br>(Collision energy (eV)) |
|-----------------|---------|------------------------------------------------------|----------------------------------------------------|
| Acetochlor      | 16.32   | 146.1>117.1(20)                                      | 223.1>146.1(20)                                    |
| Alachlor        | 22.22   | 188.1>160.1(10)                                      | 161.1>146.1(12)                                    |
| Aldrin          | 17.56   | 263.0>192.9(32)                                      | 263.0>227.9(26)                                    |
| Ametryn         | 16.14   | 227.1>212.1(15)                                      | 227.1>170.1(15)                                    |
| Anilofos        | 16.35   | 226.0>184.0(15)                                      | 226.0>157.0(15)                                    |
| Atrazine        | 12.18   | 215.1>200.1(10)                                      | 200.1>104.1(20)                                    |
| Azoxystrobin    | 34.17   | 344.1>329.1(20)                                      | 388.1>345.1(15)                                    |
| Benfuracarb     | 30.01   | 190.1>144.1(10)                                      | 164.1>149.1(10)                                    |
| $\alpha$ -BHC   | 11.10   | 180.9>144.9(15)                                      | 182.9>146.9(15)                                    |
| $\beta$ - BHC   | 12.31   | 180.9>144.9(15)                                      | 182.9>146.9(15)                                    |
| $\gamma$ -BHC   | 13.66   | 180.9>144.9(15)                                      | 182.9>146.9(15)                                    |
| $\delta$ - BHC  | 12.49   | 180.9>144.9(15)                                      | 182.9>146.9(15)                                    |
| Bifenox         | 28.54   | 341.0>310.0(12)                                      | 311.0>279.0(15)                                    |
| Bifenthrin      | 28.19   | 181.1>166.1(22)                                      | 165.1>139.0(25)                                    |
| Boscalid        | 31.51   | 342.0>140.0(15)                                      | 344.0>142.0(15)                                    |
| Bromobutide     | 15.27   | 232.1>176.1(10)                                      | 232.1>114.0 (10)                                   |
| Bromoxynil      | 26.54   | 126.9>57.0(8)                                        | 126.9>67.0 (8)                                     |
| Buprofezin      | 23.87   | 249.1>193.1(10)                                      | 172.1>57.0(10)                                     |
| Butachlor       | 22.22   | 237.1>160.1(10)                                      | 176.1>146.1(10)                                    |
| Butralin        | 19.14   | 266.1>190.1(15)                                      | 266.2>220.1(15)                                    |
| Carbophenothion | 26.13   | 342.0>157.0(10)                                      | 342.0>296.0(5)                                     |
| Carboxin        | 23.65   | 235.1>143.0(15)                                      | 143.0>87.0(15)                                     |
| Chlorfenapyr    | 24.69   | 247.0>246.6(5)                                       | 247.0>226.8(20)                                    |
| Chlorfluazuron  | 22.61   | 321.0>303.6(25)                                      | 323.0>306.1(30)                                    |
| Chlorpropham    | 10.07   | 213.1>127.0(15)                                      | 127.0>65.0(25)                                     |
| Chlorpyrifos    | 18.20   | 197.0>169.0(15)                                      | 313.9>258.0(15)                                    |

|                      |       |                 |                  |
|----------------------|-------|-----------------|------------------|
| Clodinafop-propargyl | 26.71 | 349.1>266.0(15) | 349.1>238.0(15)  |
| Clomazone            | 12.25 | 125.0>89.0 (5)  | 204.1>107.0(15)  |
| Coumaphos            | 30.66 | 226.0>163.0(20) | 362.0>334.0(19)  |
| Cycloxydim           | 15.29 | 198.1>81.6(15)  | 198.1>107.4(10)  |
| Cyfluthrin 1         | 31.42 | 165.0>91.0(15)  | 163.0>91.0(12)   |
| Cyfluthrin 2         | 31.54 | 165.0>91.0(15)  | 163.0>91.0(12)   |
| Cyfluthrin 3         | 31.63 | 165.0>91.0(15)  | 163.0>91.0(12)   |
| Cyfluthrin 4         | 31.67 | 165.0>91.0(15)  | 163.0>91.0(12)   |
| Cyhalothrin 1        | 28.19 | 181.0>152.0(23) | 208.1>181.0(10)  |
| Cyhalothrin 2        | 28.32 | 181.0>152.0(23) | 208.1>181.0(10)  |
| Cypermethrin 1       | 32.59 | 181.0>152.0(25) | 163.0>127.0(10)  |
| Cypermethrin 2       | 32.88 | 181.0>152.0(25) | 163.0>127.0(10)  |
| Cypermethrin 3       | 33.37 | 181.0>152.0(25) | 163.0>127.0(10)  |
| Cypermethrin 4       | 33.70 | 181.0>152.0(25) | 163.0>127.0(10)  |
| Cyproconazole        | 24.31 | 222.1>125.1(20) | 224.1>127.1(20)  |
| Cyprodinil           | 19.59 | 224.1>208.1(20) | 225.1>210.1(18)  |
| Deltamethrin         | 34.37 | 181.0>152.0(20) | 253.0>198.0(30)  |
| Diafenthiuron        | 25.06 | 311.2>296.2(15) | 254.15>220.1(15) |
| Diazinon             | 13.43 | 179.1>137.1(15) | 137.1>84.0(10)   |
| Diclofop-methyl      | 27.11 | 340.0>252.8(10) | 253.0>161.5(10)  |
| Dieldrin             | 23.06 | 277.0>240.9(10) | 276.9>206.9(20)  |
| Diethofencarb        | 18.08 | 267.2>225.1(8)  | 225.1>125.1(15)  |
| Difenzoquat          | 23.61 | 234.0>232.8(15) | 234.0>129.6(15)  |
| Diflufenican         | 27.25 | 266.1>246.1(10) | 394.1>266.1(10)  |
| $\alpha$ -endosulfan | 21.63 | 240.9>205.9(20) | 271.9>236.9(18)  |
| $\beta$ -endosulfan  | 23.07 | 240.9>205.9(20) | 271.9>236.9(18)  |
| Endrin               | 24.13 | 280.9>244.9(12) | 280.9>244.9(5)   |
| Ethofumesate         | 17.27 | 207.1>161.1(10) | 286.1>207.1(12)  |
| Etridiazole          | 6.81  | 210.9>140.0(15) | 213.0>184.9(10)  |

|                   |       |                  |                 |
|-------------------|-------|------------------|-----------------|
| Famoxadone        | 34.27 | 224.1>196.1(10)  | 330.1>224.1(10) |
| Fenarimol         | 29.59 | 139.0>111.0(15)  | 219.0>107.0(15) |
| Fenazaquin        | 28.44 | 145.1>117.1(15)  | 160.1>117.1(20) |
| Fenbuconazole     | 31.08 | 198.1>129.0(10)  | 129.0>102.0(15) |
| Fenitrothion      | 17.08 | 277.0>260.0 (10) | 277.0>109.0(20) |
| Fenobucarb        | 9.20  | 150.1>121.1(10)  | 121.1>77.1(15)  |
| Fenoxaprop-P      | 30.06 | 361.0>288.0 (10) | 288.0>260.0(10) |
| Fenpropathrin     | 28.32 | 181.1>152.1(23)  | 265.2>210.1(15) |
| Fenthion          | 18.10 | 278.0>108.6(25)  | 278.0>168.5(25) |
| Fipronil          | 20.74 | 367.0>213.0(25)  | 213.0>178.0(16) |
| Fluazifop-P-butyl | 24.76 | 383.1>282.1(15)  | 383.1>254.1(20) |
| Fludioxonil       | 23.59 | 248.1>154.0(20)  | 248.1>182.0(15) |
| Flufenoxuron      | 14.28 | 305.0>125.9(20)  | 307.0>125.8(20) |
| Flumioxazin       | 32.63 | 287.1>259.1(15)  | 354.1>326.1(10) |
| Fluorochloridone  | 18.92 | 187.0>159.0(10)  | 172.0>144.9(15) |
| Fluoroglycofen    | 29.85 | 223.0>131.7(15)  | 344.0>178.8(15) |
| Fluroxypyr        | 27.17 | 181.0>133.8(30)  | 209.0>178.5(25) |
| Flusilazole       | 23.94 | 233.1>165.1(20)  | 233.1>152.1(20) |
| Flutolanil        | 22.96 | 173.1>145.1(15)  | 281.1>173.1(15) |
| Fomesafen         | 18.93 | 311.0>173.6(15)  | 313.0>173.7(15) |
| Fonofos           | 12.90 | 137.0>109.0(10)  | 246.0>137.0(10) |
| Haloxypop-P       | 21.78 | 375.0>288.0(25)  | 316.0>91.0(25)  |
| Imazalil          | 13.00 | 175.0>147.0(16)  | 173.1>145.0(20) |
| Irgarol 1051      | 20.48 | 182.0>108.7(10)  | 238.0>181.6(10) |
| Isocarbophos      | 18.57 | 136.0>108.0(15)  | 230.0>212.0(10) |
| Isodrin           | 19.05 | 263.0>192.9(30)  | 263.0>190.9(30) |
| Isufenphos-methyl | 19.64 | 199.1>121.0(15)  | 241.1>199.1(10) |
| Isoprothiolane    | 23.01 | 290.1>118.0 (15) | 290.1>204.1(15) |
| Kresoxim-methyl   | 24.25 | 206.1>131.1(15)  | 131.1>116.1(20) |

|                  |       |                  |                 |
|------------------|-------|------------------|-----------------|
| Malathion        | 17.73 | 173.01>99.0(10)  | 127.0>99.0(10)  |
| Mefenacet        | 29.27 | 192.0>136.0(15)  | 193.1>137.0(15) |
| Mepronil         | 25.80 | 269.1>119.1(10)  | 269.2>210.1(10) |
| Metazachlor      | 19.76 | 209.1>132.1(12)  | 133.1>117.0(20) |
| Methidathion     | 21.24 | 145.0>85.0(10)   | 145.0>58.0(15)  |
| Metribuzin       | 15.29 | 198.1>82.0(20)   | 198.1>89.0(16)  |
| Monocrotophos    | 28.23 | 192.1>164.0(12)  | 192.1>127.0(10) |
| Myclobutanil     | 23.76 | 179.1>125.1(15)  | 179.1>152.1(15) |
| Napropamide      | 22.54 | 128.1>72.0 (10)  | 271.2>128.1(5)  |
| Norflurazon      | 26.57 | 303.0>145.0(20)  | 305.0>145.0(20) |
| o,p'-DDD         | 25.17 | 235.0>165.0(20)  | 235.0>199.0(18) |
| o,p'-DDE         | 21.45 | 246.0>176.0(25)  | 317.9>246.0(20) |
| o,p'-DDT         | 23.66 | 235.0>165.0(20)  | 235.0>199.0(18) |
| Oxadiazon        | 23.71 | 258.1>175.0(10)  | 304.1>260.1(10) |
| Oxadixyl         | 25.35 | 163.1>132.1(10)  | 233.1>146.1(10) |
| Oxaziclomefone   | 7.36  | 187.0>158.8(20)  | 189.0>160.7(20) |
| Oxyfluorfen      | 24.05 | 361.0>300.0 (12) | 300.0>223.0(10) |
| p,p'-DDD         | 25.25 | 235.0>165.0(20)  | 235.0>199.0(18) |
| p,p'-DDE         | 23.25 | 246.0>176.0(25)  | 317.9>246.0(20) |
| p,p'-DDT         | 26.49 | 237.0>165.0(20)  | 235.0>199.0(18) |
| Parathion        | 18.25 | 109.0>81.0(10)   | 291.0>109.0(15) |
| Parathion-methyl | 15.64 | 263.0>109.0(15)  | 233.0>124.0(15) |
| Penconzole       | 19.99 | 248.0>156.7(25)  | 159.0>122.8(20) |
| Pendimethalin    | 19.93 | 252.1>162.1(12)  | 252.1>191.1(12) |
| Permethrin 1     | 30.37 | 183.0>168.0(15)  | 183.0>153.0(15) |
| Permethrin 2     | 30.53 | 183.0>168.0(15)  | 183.0>153.0(15) |
| Phenthoate       | 20.62 | 274.0>125.0(7)   | 146.0>118.0(10) |
| Phorate          | 10.93 | 260.0>75.0(5)    | 121.0>65.0(10)  |
| Phosalone        | 28.96 | 182.0>111.0(15)  | 182.0>138.0(10) |

|                   |       |                  |                 |
|-------------------|-------|------------------|-----------------|
| Phosmet           | 27.95 | 160.0>77.0(20)   | 160.0>133.0(15) |
| Pirimicarb        | 14.66 | 166.1>96.1(10)   | 166.1>137.1(10) |
| Pirimiphos-methyl | 17.25 | 290.1>233.1(10)  | 290.1>125.0(15) |
| Pretilachlor      | 23.35 | 162.1>132.1(15)  | 262.1>202.1(15) |
| Probenazole       | 12.56 | 159.0>130.0(5)   | 159.0>103.0(15) |
| Procymidone       | 20.89 | 283.0>96.0(15)   | 285.0>257.0(10) |
| Profenofos        | 23.10 | 338.9>269.0(20)  | 336.9>188.0(30) |
| Prometryn         | 16.35 | 241.1>184.1(15)  | 226.1>184.1(12) |
| Propachlor        | 9.29  | 196.1>120.0(10)  | 176.1>120.0(10) |
| Propanil          | 15.44 | 217.0>161.0(10)  | 219.0>163.0(10) |
| Propargite        | 27.17 | 173.1>135.1(12)  | 173.1>105.1(12) |
| Propazine         | 12.37 | 214.1>172.1(12)  | 229.1>214.1(10) |
| Propiconazol 1    | 26.41 | 259.0>173.0(20)  | 261.0>175.0(20) |
| Propiconazol 2    | 26.61 | 259.0>173.0(20)  | 261.0>175.0(20) |
| Propyzamide       | 13.00 | 173.0>145.0 (15) | 173.0>109.0(18) |
| Pyraclonil        | 30.00 | 299.0>256.6 (15) | 279.0>262.6(25) |
| Pyriproxyfen      | 29.11 | 136.0>78.0(15)   | 136.1>96.0(15)  |
| Quinalphos        | 20.58 | 146.0>118.0(15)  | 274.1>121.0(10) |
| Quizalofop-ethyl  | 31.63 | 372.1>299.1(15)  | 299.1>192.1(26) |
| Simetryn          | 15.88 | 213.1>170.1(10)  | 213.1>185.1(10) |
| Spirodiclofen     | 30.35 | 312.1>259.1(10)  | 312.1>109.0(10) |
| Sulfotep          | 10.75 | 322.0>146.0(25)  | 202.0>146.0(15) |
| Tebuconazole      | 26.92 | 250.1>125.06(20) | 252.1>127.1(20) |
| Terbufos          | 10.93 | 231.1>203.0(10)  | 231.0>175.0(15) |
| Tetramethrin 1    | 27.97 | 164.1>107.1(17)  | 164.1>135.1(10) |
| Tetramethrin 2    | 28.16 | 164.1>107.1(17)  | 164.1>135.1(10) |
| Thifluzamide      | 24.23 | 194.0>166.0(12)  | 448.9>428.9(10) |
| Thiobencarb       | 17.62 | 257.1>100.0(10)  | 100.0>72.0(12)  |
| Tolclofos-methyl  | 15.82 | 264.9>250.0(15)  | 265.0>220.0(20) |



|                 |       |                  |                  |
|-----------------|-------|------------------|------------------|
| Tolfenpyrad     | 34.37 | 383.2>171.1(20)  | 383.1>145.1(20)  |
| Triadimefon     | 29.53 | 208.1>181.1(10)  | 208.1>127.0 (10) |
| Triadimenol     | 20.62 | 168.0>70.0(10)   | 128.1>65.0(10)   |
| Triallate       | 13.97 | 268.0>184.0(22)  | 270.0>186.0(22)  |
| Triazophos      | 25.95 | 257.1>162.0 (10) | 161.0>134.0(10)  |
| Trifloxystrobin | 24.25 | 116.0>89.0(15)   | 131.0>130.0(10)  |
| Trifluralin     | 10.57 | 264.1>160.0(15)  | 306.1>264.1(15)  |
| Vinclozolin     | 15.65 | 212.0>172.0(15)  | 285.0>212.0(15)  |
| Zarilamid       | 24.67 | 189.0>124.9(10)  | 293.1>154.4(15)  |

Table S5.Sample collection in each city of Shandong Province

|              | Jinan    |           | Taian             | Weifang        |                   | Linyi             | Liaocheng | Binzhou        |
|--------------|----------|-----------|-------------------|----------------|-------------------|-------------------|-----------|----------------|
|              | Zhangqiu | Xiazhuang | Feicheng          | Anqiu          | Shouguang         | Cangshan          | Guanxian  | Boxing         |
|              | Market   | Vegetable | Supermarket       | Vegetable base | Market            | Market            | Market    | Supermarket    |
|              | Base     | base      | Vegetable<br>base | Supermarket    | Vegetable<br>base | Vegetable<br>base |           | Vegetable base |
| Strawberry   | 2        | 2         | 2                 | 1              | 2                 | 2                 | 1         | 2              |
| Cucumber     | 2        | 1         | 2                 | 2              | 2                 | 2                 | 1         | 2              |
| Watermelon   | 2        | 1         | 2                 | 1              | 2                 | 1                 | 1         | 1              |
| Lotus root   | 1        | 1         | 1                 | 1              | 2                 | 1                 | 1         | 1              |
| Melon        | 2        | 1         | 2                 | 1              | 3                 | 1                 | 1         | 1              |
| Leek         | 4        | 2         | 4                 | 2              | 4                 | 4                 | 1         | 4              |
| Leaf lettuce | 1        | 1         | 2                 | 1              | 1                 | 1                 | 1         | 1              |
| Crown daisy  | 2        | 1         | 3                 | 2              | 3                 | 2                 | 1         | 2              |
| Asparagus    | 1        | 1         | 1                 | 1              | 1                 | 1                 | 1         | 1              |
